# Supplementary material for: A Novel Fluorescent Probe for Selective Detection of Hydrazine and Its Application in Imaging
Source: Biosensors (Basel). 2021 Apr 22;11(5):130. doi: 10.3390/bios11050130 (PMC8143562; doi:10.3390/bios11050130)
Supplement: Supplementary file 1 [file biosensors-11-00130-s001.zip › biosensors-1161912-supplementary.pdf]

## Supporting Information

# A Novel Fluorescent Probe for Selective Detection of Hydrazine and Its Application in Imaging

Ruo-Jun Man <sup>1,\*†</sup>, Meng-Ke Wu <sup>1,†</sup>, Bing Yang <sup>2,\*</sup> and Yu-Shun Yang <sup>3,\*</sup>

<sup>1</sup> Guangxi Biological Polysaccharide Separation, Purification and Modification Research Platform, Guangxi University for Nationalities, Nanning 530006, China;wmk135076@163.com

<sup>2</sup> School of Chemistry and Chemical Engineering, Nantong University, Nantong 226019, China

<sup>3</sup> Research Centre of Sensors and Functional Materials, Hi-Techjig Co. Ltd., Zhenjiang 212415, China

\* Correspondence: manruojun@163.com (R.-J.M.); yangbing111@ntu.edu.cn (B.Y.); ys\_yang@nju.edu.cn (Y.-S.Y.); Tel.: +86-25-89682572 (Y.-S.Y.)

† The authors contributed equally to this work.

## Table of Contents

|                                                                                             |    |
|---------------------------------------------------------------------------------------------|----|
| The fluorescence intensity at 460 nm changes in various pH environments.....                | S1 |
| The fluorescence intensity at 460 nm changes in various temperature conditions.....         | S2 |
| The fluorescence intensity at 460 nm changes in various time conditions .....               | S3 |
| Job's plots analysis for <b>TZPzine-1</b> and hydrazine interaction.....                    | S3 |
| The application of <b>TZPzine-1</b> in detecting systems with different water samples. .... | S4 |
| NMR and HRMS data.....                                                                      | S4 |
| The comparison with typical probes for hydrazine.....                                       | S6 |

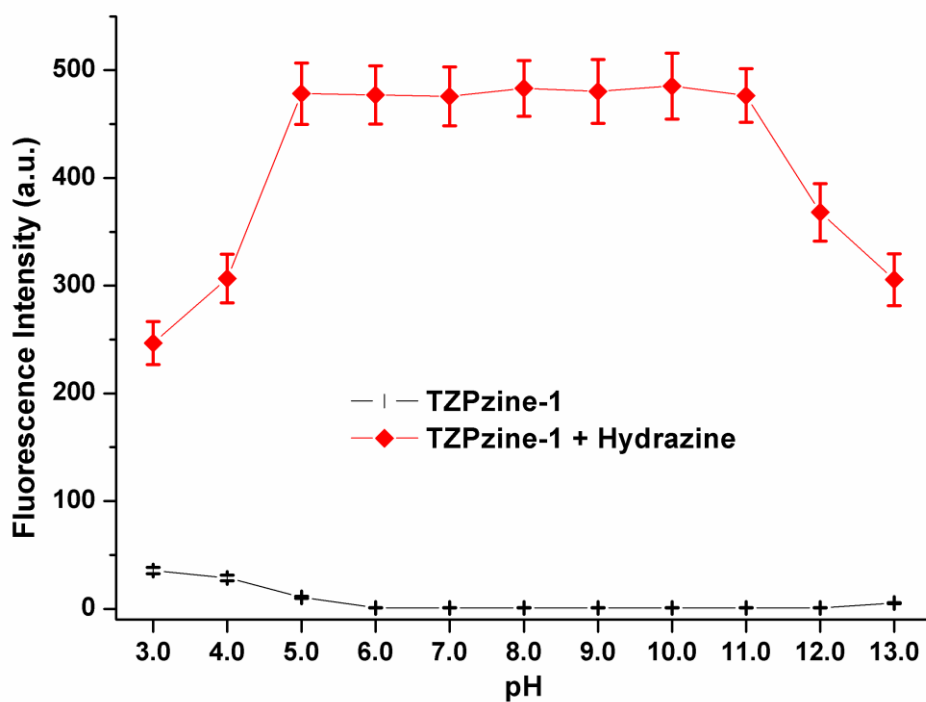

**Figure S1.** The fluorescence intensity at 460 nm changes in various pH environments. (Black: 10  $\mu$ M **TZPzine-1**; Red: **TZPzine-1** with hydrazine). Temperature: 37  $^{\circ}$ C; Incubation time: 20 min; Excitation wavelength: 365 nm.

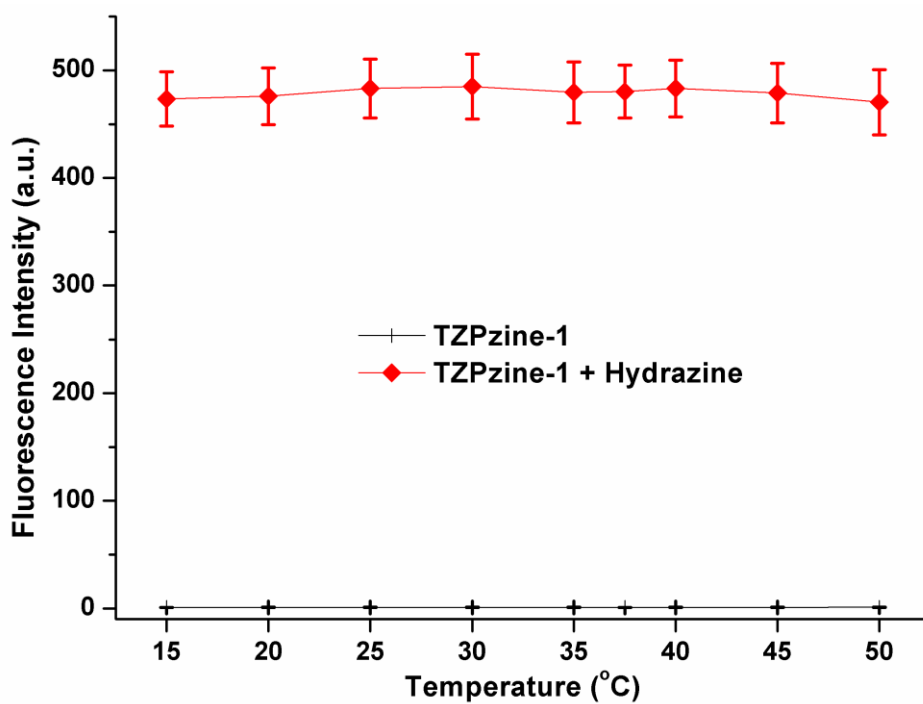

**Figure S2.** The fluorescence intensity at 460 nm changes in various temperature conditions. (Black: 10  $\mu$ M **TZPzine-1**; Red: **TZPzine-1** with hydrazine). pH: 7.4; Incubation time: 20 min; Excitation wavelength: 365 nm.

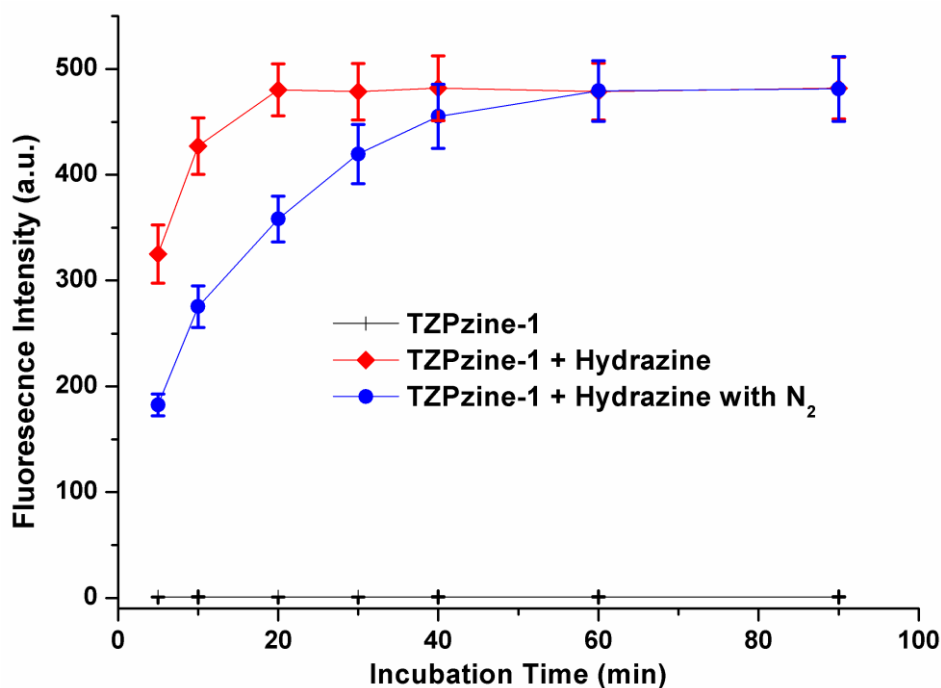

Figure S3. The fluorescence intensity at 460 nm changes in various time conditions. (Black: 10  $\mu$ M **TZPzine-1**; Red: **TZPzine-1** with hydrazine; Blue: **TZPzine-1** with hydrazine with nitrogen). pH: 7.4; Temperature: 37  $^{\circ}$ C; Excitation wavelength: 365 nm.

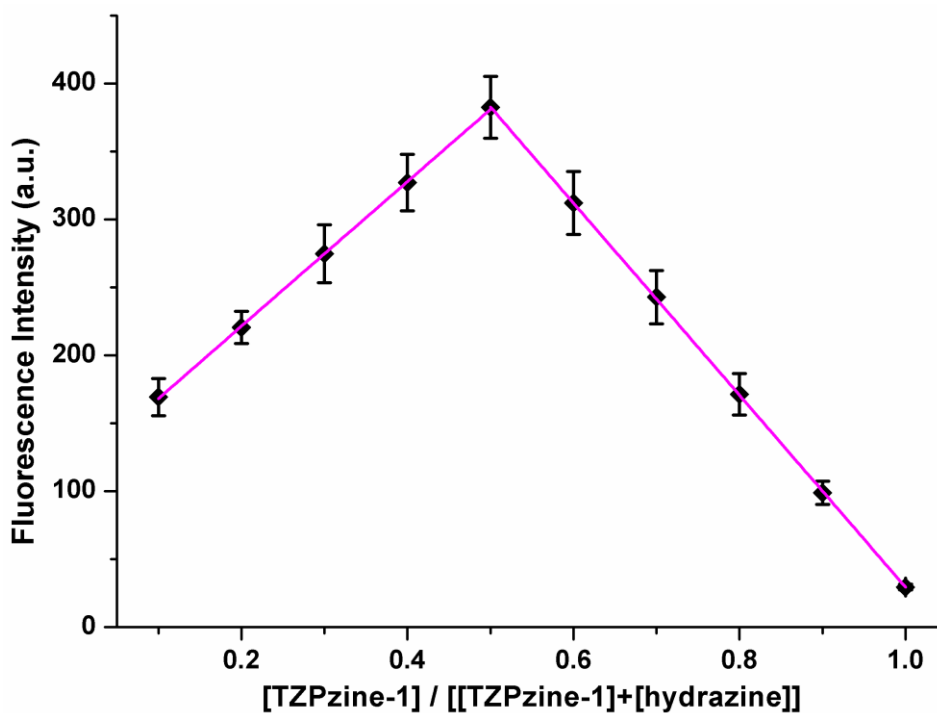

Figure S4. Job's plots analysis for **TZPzine-1** and hydrazine interaction with a total concentration of  $[\text{TZPzine-1}] + [\text{hydrazine}]$  at 200  $\mu$ M by fluorescence response. The fluorescence emission at 460 nm was used.

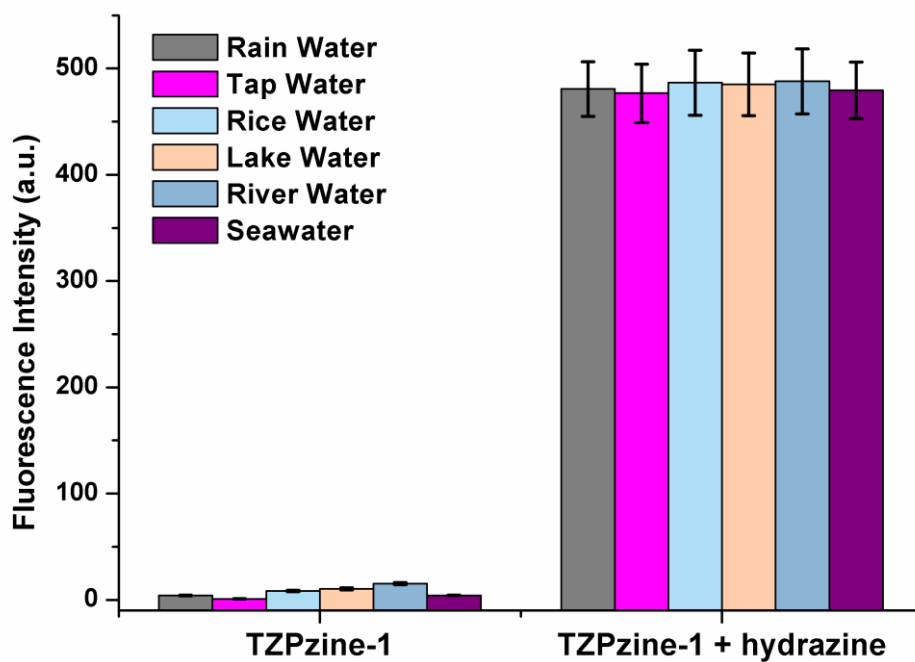

Figure S5. The application of **TZPzine-1** in detecting systems with different water samples from rain, tap, rice, lake, river and sea.

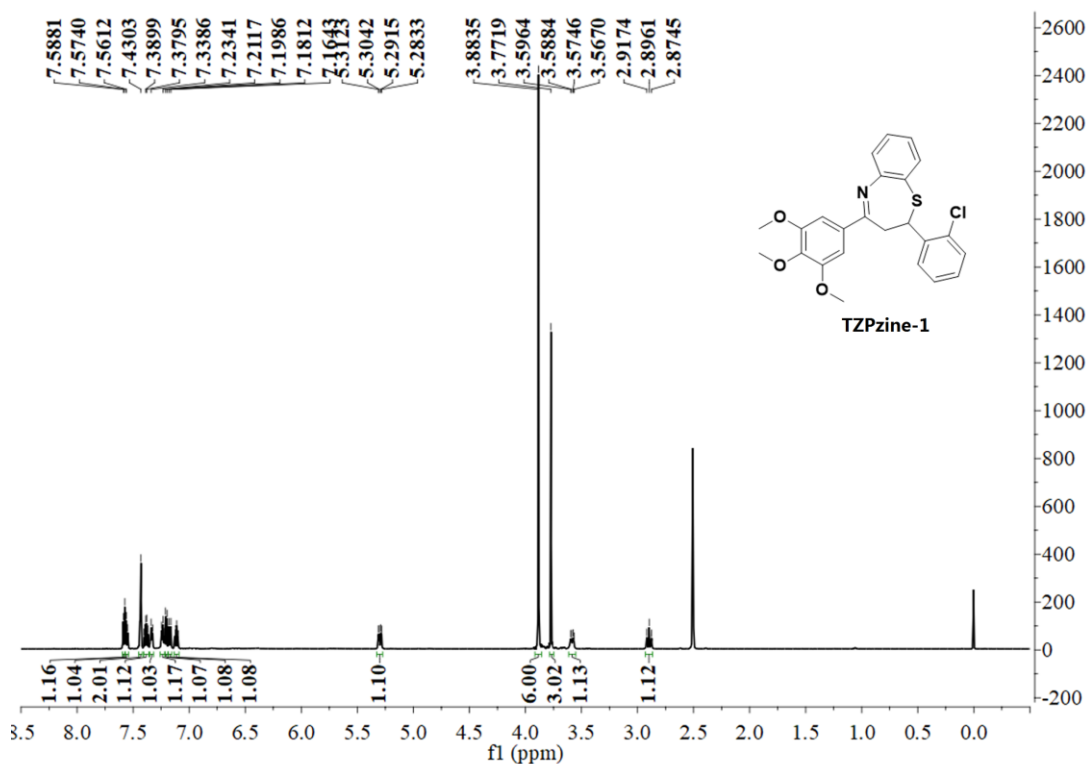

Figure S6.  $^1\text{H}$  NMR of the probe **TZPzine-1** (600 MHz, in  $\text{DMSO-}d_6$ ).

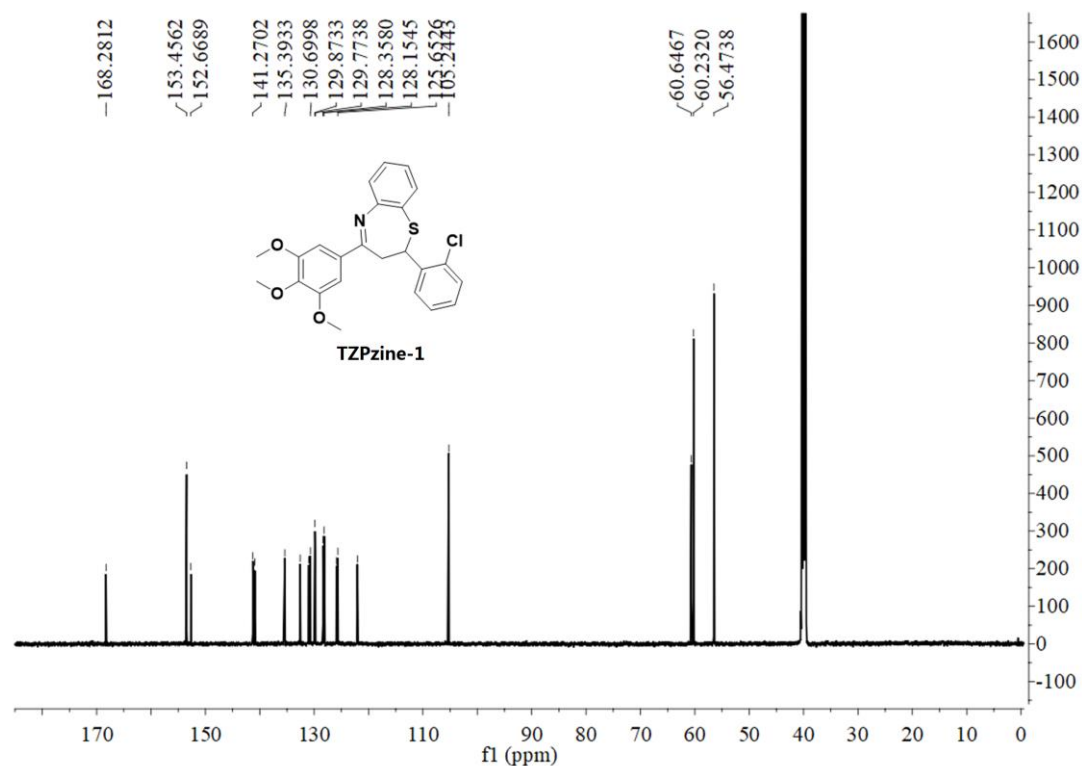

Figure S7.  $^{13}\text{C}$  NMR of the probe **TZPzine-1** (151 MHz, in  $\text{DMSO-}d_6$ ).

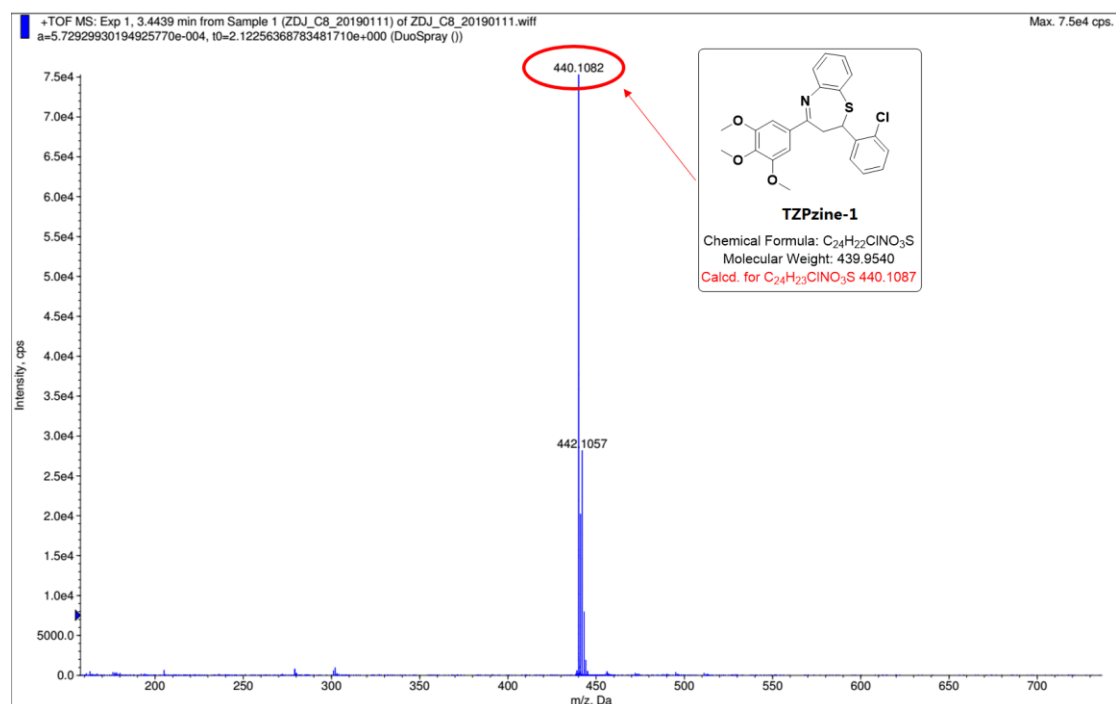

Figure S8. HRMS spectrum of the probe **TZPzine-1** in acetonitrile.

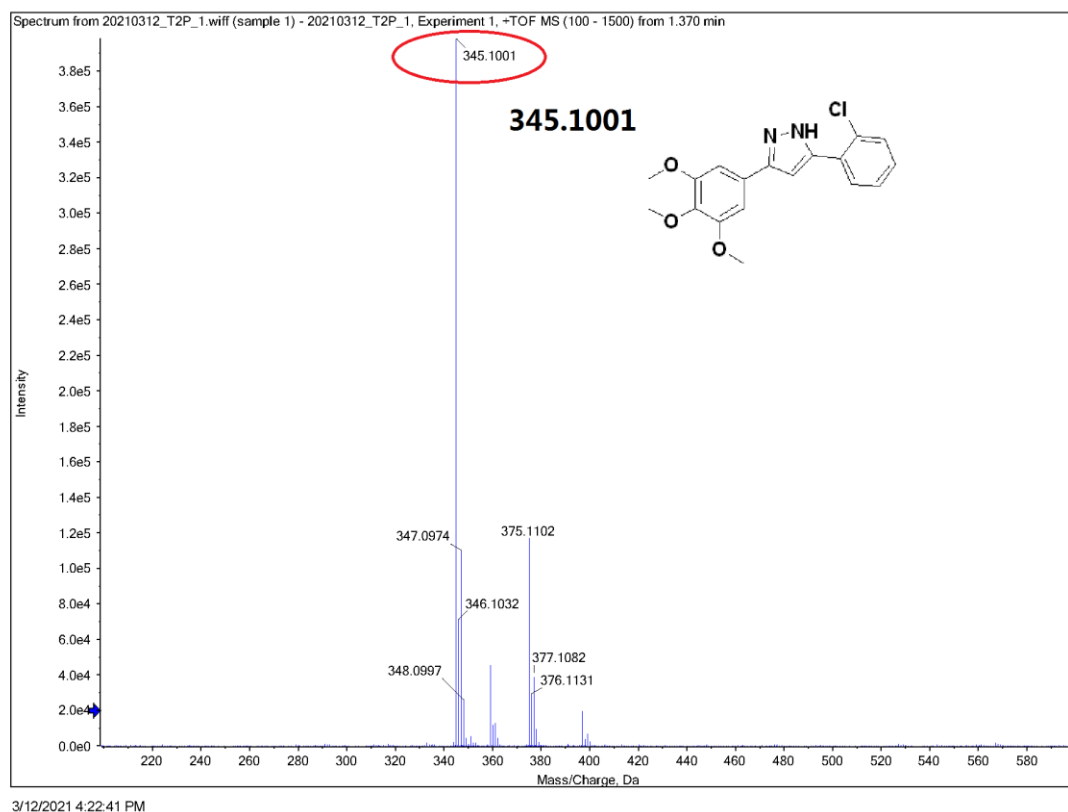

**Figure S9.** HRMS spectrum of the detecting product in acetonitrile.

**Table S1.** The comparison with typical probes for hydrazine.

| Reference | Recognition Group            | $\lambda_{em}/\lambda_{ex}$<br>(nm) | Response<br>degree<br>(-fold) | Test<br>time<br>(min) | LOD<br>(nM) | Application                            |
|-----------|------------------------------|-------------------------------------|-------------------------------|-----------------------|-------------|----------------------------------------|
| Ref 14    | 4-bromo butyrate             | 458/343<br>368/285 <sup>a</sup>     | 88                            | 1                     | 66          | <i>Candida albicans</i>                |
| Ref 15    | trifluoroacetyl acetate      | 501/348<br>445/295 <sup>a</sup>     | 33                            | 60                    | 100         | TLC plate,<br>HeLa cells               |
| Ref 16    | 2-(pyridin-4-yl)acetonitrile | 510/450<br>640/560 <sup>a</sup>     | 3.3                           | 60                    | 380         | TLC plate,<br>A549 cells,<br>Zebrafish |
| Ref 17    | benzopyrylium                | 460/415<br>694/647 <sup>a</sup>     | 8                             | 30                    | 87          | TLC plate,<br>HeLa cells               |
| Ref 18    | dinitrile                    | 490/350                             | 80                            | 30                    | 12.2        | HeLa cells,<br>Zebrafish               |
| Ref 19    | phthalimide                  | 439/371                             | 350                           | 60                    | 2673        | Filter paper                           |
| Ref 20    | 4-bromo butyrate             | 627/580<br>814/780 <sup>a</sup>     | 23                            | 17                    | 12          | HeLa cells,<br>Mice                    |
| Ref 21    | acetyl                       | 400/341<br>470/382 <sup>a</sup>     | 10                            | 7                     | 31000       | HeLa cells                             |
| Ref 22    | levulinate                   | 458/360                             | 250                           | 15                    | 2460        | None                                   |

|                      |                         |                                 |            |           |           |                                                                         |
|----------------------|-------------------------|---------------------------------|------------|-----------|-----------|-------------------------------------------------------------------------|
| Ref 23               | 4-bromo butyrate        | 521/360<br>387/360 <sup>a</sup> | 3050       | 30        | 5.8       | Test paper,<br>Water samples,<br>MDA-MB-231<br>cells                    |
| Ref 24               | phthalimide             | 430/360                         | 60         | 40        | 48        | Hct116 cells,<br>HepG2 cells                                            |
| Ref 25               | aldehyde                | 556/391                         | 38         | 60        | 1.12      | Paper strip,<br>Soil samples,<br>Tissue                                 |
| Ref 26               | cyano                   | 516/435<br>572/525 <sup>a</sup> | > 100      | 12        | 163       | Water samples,<br>HeLa cells                                            |
| Ref 27               | acetyl                  | 480/371                         | 49         | 40        | 120       | Water samples,<br>MCF-7 cells,<br><i>Arabidopsis</i><br><i>Thaliana</i> |
| <b>This<br/>work</b> | <b>benzo-thiazepine</b> | <b>460/365</b>                  | <b>480</b> | <b>20</b> | <b>50</b> | <b>Water<br/>samples,<br/>HeLa cells</b>                                |

<sup>a</sup> The wavelength of the second emission and corresponding excitation (ratiometric analysis).
